# Supplementary material for: Cell-Free DNA-Methylation-Based Methods and Applications in Oncology
Source: Biomolecules. 2020 Dec 15;10(12):1677. doi: 10.3390/biom10121677 (PMC7765488; doi:10.3390/biom10121677)
Supplement: Supplementary file 1 [file biomolecules-10-01677-s001.xlsx]

## Sheet: Foglio1
	Methods for DNA methylation evaluation
	Table S1. Summary of the analytical workflows of the assays for the evaluation of DNA-methylation from cell-free DNA samples classified by DNA treatment (blue), library preparation (yellow), amplification (grey) and analysis (orange) steps. WGBS: Whole Genome Bisulfite Sequencing; RRBS: Reduced representation of bisulfite sequencing; scRRBS: single-cell RRBS; MTCA-seq: methylated CpG tandems ampl…
	DNA pre-treatment	Method	Assay step
			Step 1	Step 2	Step 3	Step 4	Step 5	Step 6	Step 7
	Bisulfite conversion based methods	WGBS	ADAPTER LIGATION	BISULFITE CONVERSION	PCR AMPLIFICATION	SEQUENCING
		PBAT	BISULFITE CONVERSION	FIRST RANDOM PRIMER EXTENTION	BEADS PURIFICATION	SECOND RANDOM PRIMER EXTENTION	BEADS PURIFICATION	SEQUENCING
		scBS-seq	BISULFITE CONVERSION	OLIGO TAGGING	5xPREAMP	BEADS PURIFICATION	OLIGO II TAGGING	PCR AMPLIFICATION	SEQUENCING
		RRBS/scRRBS	MRE DIGESTION	ADAPTER LIGATION	BISULFITE CONVERTION	PCR AMPLIFICATION	SEQUENCING
		MTCA-seq	BISULFITE CONVERSION	CpG SPECIFIC AMPLIFICATION	LIBRARY PREPARATION	PCR AMPLIFICATION	SEQUENCING
		TARGET BS-seq	BISULFITE CONVERSION	TARGET AMPLIFICATION	LIBRARY PREPARATION	PCR AMPLIFICATION	SEQUENCING
				LIBRARY PREPARATION	PROBE TARGET CAPTURE	PCR AMPLIFICATION	SEQUENCING
		INFINIUM ARRAY	BISULFITE CONVERTION	WGA	ENZYME FRAGMENTATION	HYBRIDIZE TO CHIP, 1 bp EXTENTION AND CHIP SCAN
		MSPCR-based methods	BISULFITE CONVERTION	ddPCR AMPLIFICATION OF TARGET GENES	FLOW CYTOMETRY	METHYL BEAMING
				PCRAMPLIFICATION WITH PRIMERS OR PROBES FOR TARGET GENES	GEL ELECTROPHORESIS
					REAL TIME qPCR
	Affinity enrichment-based methods	MeKL-chip	MBD CAPTURE	KLM PCR	Cy3/cy5 LABEL	CO-HYBRIDIZE TO CHIPAND CHIP SCAN
		cfMeDIP	ADAPTER TAGGING	l FILLER DNA	DENATURATION AND IMMUNOPRECIPITATION	PCR AMPLIFICATION	SEQUENCING
		MBD seq	ADAPTER TAGGING	MBD CAPTURE	ELUTION WITH INCREASING SALT CONCENTRATION	PCR AMPLIFICATION	SEQUENCING
	Enzymatic plus chemical modifications- based methods	TAPS	TET OXIDATION	BORANE REDUCTION	PCR AMPLIFICATION	LIBRARY PREPARATION	SEQUENCING
		EM-seq	TET2 OXIDATION	DNA DENATURATION	APOBEC CONVERSION	PCR AMPLIFICATION	LIBRARY PREPARATION	SEQUENCING
	DNA TREATMENT
	LIBRARY PREPARATION
	AMPLIFICATION
	ANALYSIS
